# Supplementary material
Source: HighWire-hosted journal article supplement (https://bjsm.bmj.com/content/54/16/946)
Supplement: inline-supplementary-material-1 [file inline-supplementary-material-1.xlsx]

## Sheet: WHO Covid Risk Register
Mass Gathering risk assessment COVID-19: key considerations
Event:					The checklist below will enable organisers to review the key considerations for hosting an event, and so inform their risk assessment of COVID-19 on the event. This will help organisers to understand and manage any additional from CoVID-19. This should be reviewed regularly during planning and updated immediately prior to the handover to the operational phase especially in light of the rapidly ev…
Date:
		Risk Assessment															Overall Risk Rating
		Additional Risk of CoVID-19 to the mass gathering				Yes / No	Score	Comments
		1	Will the event take place in a host country with documented active local transmission (community spread)?			Yes	1
		2	Will the event include participants from countries that have documented active local transmission (community spread)?			Yes	1											Overall Risk Rating		Very High
		3	Will the event include a significant number of participants at higher risk of severe disease (eg, people > 65 years of age, people with underlying health conditions)?			Yes
		4	Will the event be primarily indoors and/or will people be in close contact with one another for a prolonged period?			Yes
					Total COVID-19 Risk Score		2 (Moderate)										* This toolkit is designed to ASSIST with determining levels of risk and appropriate mitigation measures that MAY be adopted for any mass gathering event. Any decision to proceed with an event MUST NOT compromise national or regional government directives intended to protect against the spread of Covid-19.
		Mitigation Measures Checklist
		Topic			Key consideration	Score Yes/Completed Maybe/In Progress No/Not Considered	Weighting	Total Score	Comments
		Understanding of the overview of the current COVID-19 situation by MG event organizers			Have the relevant organizers and responsible staff been informed on the most up-to-date COVID-19 outbreak guidances avaliable (official web-resourses available from WHO, CDC, ECDC, UN, local PH authorities)? And are the relavent organizers and responsible staff committed to following the available guidances?	No/Not Considered	1	0	(https://www.who.int/publications-detail/key-planning-recommendations-for-mass-gatherings-in-the-context-of-the-current-covid-19-outbreak)								KEY
					Are organizers aware of global and local daily situation reports as provided by WHO or local PH authorities?	No/Not Considered	1	0									Very Low	Overall risk of transmission and further spread of COVID-19 is considered very low
					Do organizers and responsible staff understand the COVID-19 risks and transmission routes, the steps that event attendees can take to limit spread, the recogniezed best practices (including repiratory etiquette, hand hygiene etc), and the travel restictions adpoted by different countries that may affect the MG?	No/Not Considered	1	0									Low	Overall risk is low, however recommend checking if mitigation measures can be strengthened
		Event emergency preparedness and response plans			Is there a Medical Response Plan for COVID-19 developed for this MG?	No/Not Considered	3	0									Moderate	Overall risk is moderate, recommend significant efforts to improve mitigation measures or reduce risk of transmission should be made
					Does the Medical Response Plan developed for the MG include information about how attendees should interface with the healthcare system (e.g., hotline/helpline #, organizers medical teams, local healthcare system)?	No/Not Considered	3	0									High	Overall risk of transmission and further spread of COVID-19 is considered high
					Is there a senior Emergency COVID-19 Outbreak Response Coordinator/Team in the MG organizational structure with defined roles and responsibilities, coordinating the health preparedness and response planning for the outbreak?	No/Not Considered	2	0									Very High	Overall risk of transmission and further spread of COVID-19 is considered very high
					Has the host country or organizer requested support from WHO and/or local public health authorities?	No/Not Considered	3	0
					Has the MG Organisers acquired the following supplies to help reduce the transmission risk?
					PPE (Masks, gloves, gowns,) for on-site medical personnel	No/Not Considered	3	0									Primary Considerations to Mitigate Covid-19 Risk at ** event
					Hand sanitizer, tissues, frequently replaced soap canisters for washrooms	No/Not Considered	3	0
					Hand sanitizers and rubs for all entrances and throughout the venue	No/Not Considered	3	0
					If a person is to fall ill/ considered to be suspected case during the event:
					Is there a procedure for meeting participants to clearly identify who to contact if unwell?	No/Not Considered	3	0
					Is there a protocol on whom meeting organizers should contact in the host country to report suspected cases and request epidemiological investigations?	No/Not Considered		0
					Are first aid services in-place and equipped to support patients with respiratory symptoms?	No/Not Considered	3	0
					Are there isolation rooms available on-site?	No/Not Considered	2	0
					Are there any designated medical facilities to managing patients with COVID-19 infection in host-country?	No/Not Considered	2	0									1	Can the event be held at a different time of the year when the risk of Covid-19 spread is likely to be lower?
					Are there transporation services with trained professionals (MedEvac or ambulatory services) available to transport criticaly ill patients with severe acute respiratory infections to a hospital or out of the host country, if necessary?	No/Not Considered	3	0
					Has a cleaning schedule been developed to ensure the venue is clean and hygienic – wiping surfaces with disinfectant is recommended (before, during, and after the event)?	No/Not Considered	2	0									2	Can the event be held 'behind closed doors' to minimise the number of persons attending the event and thus reducing the risk of Covid-19 spread?
					Are there established screening measures in place for participants at PoE, venues, routes and on-site medical facilities (first aid points)? (Please specify in Comments what these screening measures include)	No/Not Considered	1	0									3	Are we happy for the event proceed if the field of competitors will be affected by ongoing international travel/border restrictions?
					Is the host country conducting COVID-19 laboratory diagnostic tests? (If yes, please specify in comments the type of COVID-19 diagnostic your country uses)	No/Not Considered	3	0									4	Are we appy to proceed with the event with all attendees, including competitors, staff and essential volunteers etc to be subject to advanecd pre-entry screening processes?
					Does the host country have a national public health emergency preparedness and response plan that can address severe respiratory diseases including COVID-19?	No/Not Considered	2	0									5	Are we prepared to commit additional resource/funding towards enhanced proceses and procedures to a)mitigate the risk of Covid-19 spread at our event, and b) safely and efficiently respond to any suspected Covid-19 cases that may arise on site during the course of the event?
					Is there commitment by the host country to provide care for any COVID-19 cases connected with the MG?	No/Not Considered	3	0
					If the event is for a duration of 14 days or longer, does the Medical Response Plan include resources and protocols for managing all public health interventions that would be necessary and supporting the national public health authorities if participants are infected and become sick at the event? (if the event is less than 14 days, please score a 0)	No/Not Considered	3	0
					If the event is for a duration of less than 14 days, does the Medical Response Plan for this MG include protocols for organizers to notify all participants of possible exposure to COVID-19 if the organizers are made aware of any suspected or confirmed cases that attended event? (if the event is 14 days or longer, please score a 0)	No/Not Considered	3	0
		Working with partners and stakeholders			Is there established collaboration and coordination between health and security sectors, which is considered as crucial?	No/Not Considered	2	0
					Are there agreed, clear and easily understood processes in place for reporting to external multi-sectoral stakeholders (including surveillance authorities, WHO, CDC, ECDC, etc.) and disseminating risk communication messages (Media)?	No/Not Considered	2	0
		Command, control, and coordination arrangements			Is there decision-making authority/body and an agreed procedure to modify, restrict, postpone or cancel the MG event related to COVID-19 outbreak?	No/Not Considered	3	0
					Are there arrangements to activate a strategic health operations center if there are suspected COVID-19 cases in connection with the MG?	No/Not Considered	2	0
					Have MG organizers and staff undergonne training and exercising on procedures and emergency mitigation measures (including those specifically listed in this checklist)?	No/Not Considered	2	0
		Risk communication			Is there a risk communication strategy for COVID-19?	No/Not Considered	3	0
					Is there a designated person(s) to lead media activities and tasked with managing all external communications with national and itnernational government officials, the general public, and the media? (If yes, please identify the spokeperson in comments)	No/Not Considered	2	0
					Has there been monitoring of national and international media established for rumors to be able to counter them early? (Please explain in the Comments what protocls are inplace for counter messaging)	No/Not Considered	2	0
					Has coordination been set up with major social media sites like Twitter and Facebook, Instagram so that messaging can be coordinated with, and assisted by, the platforms?	No/Not Considered	2	0
		Public health awareness on COVID-19 before and during the event			Has public health advice on clinical features of COVID-19, preventive measures, especially respiratory etiquette and hand hygiene practices been shared to all participants, staff, and personnel of all relevant stakeholders?	No/Not Considered	3	0
					Has public advice include the information on the meaning of the following measures: quarantine, self-isolation and self-monitoring? (WHO does not currently recommend quarantine for healthy travellers or other travel restrictions)	No/Not Considered	2	0
		Surge capacity			Are there any surge arrangements in place in the event of a public health emergency during the MG - (i.e. suspected and confirmed cases of COVID-19?
					Do these surge arrangements include funding for mitigation measures?	No/Not Considered	3	0
					Do these surge arrangements include stockpiles of equipment (e.g., PPE, etc)	No/Not Considered	3	0
					Do these surge arrangements include training of extra staff?	No/Not Considered	2	0
					Do these surge arrangements include volunteers?	No/Not Considered	2	0
	Yes	0				Sum of Mitigation Measures		0
	No	1				Total Mitigation Score (%)		0	(Very unprepared to mitigate COVID-19 impacts)
		2
		© World Health Organization 2020. Some rights reserved. This work is available under the CC BY-NC-SA 3.0 IGO licence.
		WHO reference number: WHO/2019-nCoV/POE mass_gathering_tool/2020.1
		Yes
		No
		Yes/Completed
		Maybe/In Progress
		No/Not Considered
